# Supplementary material for: Establishment and analysis of a reference transcriptome for Spodoptera frugiperda
Source: PubMed Central journal article supplement (PMC4150953; doi:10.1186/1471-2164-15-704), 2014-08-23
Supplement: 12864_2014_6384_MOESM5_ESM.pdf [file 12864_2014_6384_MOESM5_ESM.pdf]

| Gene name                                               | Sf_TR2012b ID    | Size (nt) | Best Blastx                                                                                             | E-value | Status  |
|---------------------------------------------------------|------------------|-----------|---------------------------------------------------------------------------------------------------------|---------|---------|
| <b>GNBP</b>                                             |                  |           |                                                                                                         |         |         |
|                                                         | joint2_c3183     | 1616      | >gi 326537522 gb ADZ93428.1  beta-1,3-glucan binding protein [ <i>Spodoptera litura</i> ]               | 0E+00   | Full    |
|                                                         | joint2_rep_c3016 | 1215      | >gi 350627242 gb AEQ33590.1  beta-1,3-glucan recognition protein 2 [ <i>Spodoptera litura</i> ]         | 2E-75   | Partial |
|                                                         | joint2_c4285     | 653       | >gi 208972529 gb ACI32825.1  beta-1,3-glucan recognition protein 1 [ <i>Helicoverpa armigera</i> ]      | 2E-88   | Partial |
| <b>PGRP</b>                                             |                  |           |                                                                                                         |         |         |
|                                                         | c10154           | 2185      | >gi 357631551 gb EHJ79021.1  peptidoglycan recognition protein-Ic [ <i>Danaus plexippus</i> ]           | 9E-37   | Full    |
|                                                         | joint2_rep_c2027 | 1444      | >gi 18202160 sp O76537.1 PGRP_TRINI RecName: Full=Peptidoglycan recognition protein                     | 2E-96   | Full    |
|                                                         | rep_c24829       | 1270      | >gi 18202160 sp O76537.1 PGRP_TRINI RecName: Full=Peptidoglycan recognition protein                     | 4E-98   | Full    |
|                                                         | c6812            | 1214      | >gi 399128031 gb AFP23116.1  peptidoglycan recognition protein B [ <i>Helicoverpa armigera</i> ]        | 8E-105  | Full    |
|                                                         | c18686           | 904       | >gi 399128031 gb AFP23116.1  peptidoglycan recognition protein B [ <i>Helicoverpa armigera</i> ]        | 6E-51   | Full    |
|                                                         | rep_c2782        | 2079      | >gi 399128033 gb AFP23117.1  peptidoglycan recognition protein C [ <i>Helicoverpa armigera</i> ]        | 1E-91   | Full    |
|                                                         | rep_c7951        | 1190      | >gi 112982725 ref NP_001037560.1  peptidoglycan recognition protein S2 precursor [ <i>Bombyx mori</i> ] | 2E-51   | Full    |
|                                                         | joint2_c7700     | 1582      | >gi 357631551 gb EHJ79021.1  peptidoglycan recognition protein-Ic [ <i>Danaus plexippus</i> ]           | 1E-34   | Partial |
|                                                         | L34141_T1        | 107       | >gi 315507103 gb ADU33187.1  peptidoglycan recognition protein D [ <i>Ostrinia nubilalis</i> ]          | 1E-14   | Partial |
|                                                         | c21899           | 572       | >gi 357612138 gb EHJ67829.1  hypothetical protein KGM_02561 [ <i>Danaus plexippus</i> ]                 | 3E-30   | Partial |
|                                                         | c18209           | 545       | >gi 315507103 gb ADU33187.1  peptidoglycan recognition protein D [ <i>Ostrinia nubilalis</i> ]          | 8E-17   | Partial |
| <b>TEP (Thioester cont. protein)</b>                    |                  |           |                                                                                                         |         |         |
|                                                         | c41436           | 333       | >gi 357605113 gb EHJ64472.1  putative tep3 [ <i>Danaus plexippus</i> ]                                  | 2E-43   | Partial |
| <b>Transmembrane receptors</b>                          |                  |           |                                                                                                         |         |         |
| <b>P77</b>                                              |                  |           |                                                                                                         |         |         |
|                                                         | c28367           | 444       | >gi 305632939 dbj BAJ16182.1  p77 homologue [ <i>Spodoptera litura</i> ]                                | 2E-38   | Partial |
| <b>Eater (EGF-domain protein)</b>                       |                  |           |                                                                                                         |         |         |
|                                                         | joint2_c4820     | 1854      | >gi 300440347 gb ADK20108.1  eater [ <i>Drosophila melanogaster</i> ]                                   | 8E-26   | Partial |
|                                                         | rep_c13922       | 1823      | >gi 300440347 gb ADK20108.1  eater [ <i>Drosophila melanogaster</i> ]                                   | 4E-29   | Partial |
|                                                         | joint2_c5622     | 2280      | >gi 300440347 gb ADK20108.1  eater [ <i>Drosophila melanogaster</i> ]                                   | 4E-68   | Partial |
|                                                         | joint2_rep_c6592 | 1709      | >gi 300440347 gb ADK20108.1  eater [ <i>Drosophila melanogaster</i> ]                                   | 2E-44   | Partial |
| <b>DSCAM</b>                                            |                  |           |                                                                                                         |         |         |
|                                                         | c28502           | 372       | >gi 357628590 gb EHJ77866.1  dscam [ <i>Danaus plexippus</i> ]                                          | 5E-31   | Partial |
|                                                         | c31413           | 429       | >gi 357628590 gb EHJ77866.1  dscam [ <i>Danaus plexippus</i> ]                                          | 9E-57   | Partial |
|                                                         | c36605           | 482       | >gi 357628590 gb EHJ77866.1  dscam [ <i>Danaus plexippus</i> ]                                          | 3E-46   | Partial |
|                                                         | c37546           | 1130      | >gi 357628590 gb EHJ77866.1  dscam [ <i>Danaus plexippus</i> ]                                          | 1E-149  | Partial |
| <b>Nimrod</b>                                           |                  |           |                                                                                                         |         |         |
|                                                         | joint2_rep_c2173 | 1968      | >gi 112983550 ref NP_001036879.1  nimrod B precursor [ <i>Bombyx mori</i> ]                             | 4E-66   | Partial |
|                                                         | joint2_rep_c8963 | 2140      | >gi 112983550 ref NP_001036879.1  nimrod B precursor [ <i>Bombyx mori</i> ]                             | 1E-113  | Partial |
| <b>Scavenger receptors</b>                              |                  |           |                                                                                                         |         |         |
|                                                         | joint2_c2139     | 2191      | >gi 283945476 ref NP_001164650.1  scavenger receptor class B member 3 [ <i>Bombyx mori</i> ]            | 7E-41   | Partial |
|                                                         | c34896           | 803       | >gi 283483658 dbj BAI66273.1  Cameo2 [ <i>Bombyx mori</i> ]                                             | 1E-92   | Partial |
|                                                         | c15860           | 1244      | >gi 283945476 ref NP_001164650.1  scavenger receptor class B member 3 [ <i>Bombyx mori</i> ]            | 6E-89   | Full    |
|                                                         | rep_c5141        | 2229      | >gi 82880638 gb ABB92836.1  scavenger receptor SR-C-like protein [ <i>Spodoptera frugiperda</i> ]       | 0.0     | Full    |
| <b>Extra cellular signal transduction and cytokines</b> |                  |           |                                                                                                         |         |         |
| <b>Persephone</b>                                       |                  |           |                                                                                                         |         |         |
|                                                         | c12701           | 731       | >gi 56418393 gb AAV91004.1  hemolymph proteinase 6 [ <i>Manduca sexta</i> ]                             | 4E-41   | Partial |
|                                                         | rep_c4857        | 1588      | >gi 56418393 gb AAV91004.1  hemolymph proteinase 6 [ <i>Manduca sexta</i> ]                             | 1E-155  | Partial |
| <b>Grass-like</b>                                       |                  |           |                                                                                                         |         |         |
|                                                         | not found        |           |                                                                                                         |         |         |
| <b>Spätzle-processing enzyme</b>                        |                  |           |                                                                                                         |         |         |
|                                                         | joint2_rep_c2954 | 1774      | >gi 357622297 gb EHJ73832.1  hemolymph proteinase 8 [ <i>Danaus plexippus</i> ]                         | 1E-114  | Full    |
|                                                         | L5381_T1         | 572       | >gi 357622297 gb EHJ73832.1  hemolymph proteinase 8 [ <i>Danaus plexippus</i> ]                         | 1E-58   | Partial |
| <b>Spätzle</b>                                          |                  |           |                                                                                                         |         |         |
|                                                         | joint2_rep_c4418 | 2173      | >gi 388252721 gb AFK24443.1  spatzle-2 [ <i>Spodoptera frugiperda</i> ]                                 | 2E-101  | Full    |
|                                                         | rep_c48337       | 695       | >gi 388252721 gb AFK24443.1  spatzle-2 [ <i>Spodoptera frugiperda</i> ]                                 | 1E-46   | Full    |
| <b>Growth Blocking Peptide</b>                          |                  |           |                                                                                                         |         |         |
|                                                         | rep_c30358       | 535       | >gi 3986192 dbj BAA34953.1  growth-blocking peptide [ <i>Spodoptera litura</i> ]                        | 5E-26   | Partial |
|                                                         | rep_c47928       | 464       | >gi 3986192 dbj BAA34953.1  growth-blocking peptide [ <i>Spodoptera litura</i> ]                        | 7E-16   | Partial |
|                                                         | joint2_rep_c335  | 2634      | >gi 3986192 dbj BAA34953.1  growth-blocking peptide [ <i>Spodoptera litura</i> ]                        | 7E-52   | Full    |
| <b>Growth Blocking Peptide Binding Protein</b>          |                  |           |                                                                                                         |         |         |
|                                                         | c21183           | 1533      | >gi 34392593 dbj BAC82630.1  growth blocking peptide binding protein [ <i>Mythimna separata</i> ]       | 2E-98   | Full    |
|                                                         | joint2_rep_c3440 | 2125      | >gi 34392593 dbj BAC82630.1  growth blocking peptide binding protein [ <i>Mythimna separata</i> ]       | 1E-138  | Full    |

|       |                  |     |                                                                                                                                |                                                                             |      |
|-------|------------------|-----|--------------------------------------------------------------------------------------------------------------------------------|-----------------------------------------------------------------------------|------|
| hdd23 | joint2_rep_c2127 | 625 | >gi 4090970 gb AAD09282.1  immune-related Hdd23 [ <i>Hyphantria cunea</i> ]                                                    | 6E-15                                                                       | Full |
|       | rep_c50634       | 663 |                                                                                                                                | 4E-14                                                                       |      |
| SRP   | joint2_rep_c284  | 616 | >gi 168701455 ref ZP_02733732.1  hypothetical protein GobsU_18155 [ <i>Gemmata obscuriglobus</i> UQM 2246]                     | 5E-15                                                                       | Full |
|       | joint2_rep_c3270 | 584 |                                                                                                                                | >gi 4090970 gb AAD09282.1  immune-related Hdd23 [ <i>Hyphantria cunea</i> ] |      |
| HCP   | joint2_rep_c520  | 831 | >gi 357604127 gb EHJ64054.1  mitochondria-associated granulocyte macrophage CSF signaling molecule [ <i>Danaus plexippus</i> ] | 3E-49                                                                       | Full |
| Upd3  | not found        |     |                                                                                                                                |                                                                             |      |

| Gene family         | Sf_TR2012b ID | Size (nt)        | Best Blastx                                                                                                    | E-value                                                                                                                  | Status  |         |
|---------------------|---------------|------------------|----------------------------------------------------------------------------------------------------------------|--------------------------------------------------------------------------------------------------------------------------|---------|---------|
| <b>Toll pathway</b> |               |                  |                                                                                                                |                                                                                                                          |         |         |
| Toll                | c21297        | 983              | >gi 357626027 gb EHJ76269.1  putative protein toll precursor [ <i>Danaus plexippus</i> ]                       | 1E-101                                                                                                                   |         |         |
|                     | c15374        | 651              | >gi 357613547 gb EHJ68577.1  putative toll [ <i>Danaus plexippus</i> ]                                         | 1E-63                                                                                                                    |         |         |
|                     | c18222        | 564              | >gi 357604744 gb EHJ64305.1  putative toll [ <i>Danaus plexippus</i> ]                                         | 1E-84                                                                                                                    |         |         |
|                     | c27553        | 438              | >gi 357611178 gb EHJ67353.1  putative toll [ <i>Danaus plexippus</i> ]                                         | 8E-52                                                                                                                    |         |         |
|                     | c44947        | 511              | >gi 357607081 gb EHJ65350.1  putative toll [ <i>Danaus plexippus</i> ]                                         | 4E-81                                                                                                                    |         |         |
|                     | c45159        | 661              | >gi 357617307 gb EHJ70712.1  putative toll [ <i>Danaus plexippus</i> ]                                         | 2E-71                                                                                                                    |         |         |
|                     | c9825         | 1044             | >gi 357613547 gb EHJ68577.1  putative toll [ <i>Danaus plexippus</i> ]                                         | 2E-47                                                                                                                    |         |         |
|                     | joint2_c10319 | 618              | >gi 357613547 gb EHJ68577.1  putative toll [ <i>Danaus plexippus</i> ]                                         | 2E-71                                                                                                                    |         |         |
|                     | joint2_c10448 | 488              | >gi 357617307 gb EHJ70712.1  putative toll [ <i>Danaus plexippus</i> ]                                         | 4E-41                                                                                                                    |         |         |
|                     | joint2_c7245  | 1199             | >gi 357613547 gb EHJ68577.1  putative toll [ <i>Danaus plexippus</i> ]                                         | 2E-97                                                                                                                    |         |         |
|                     | joint2_c4264  | 345              | >gi 357622857 gb EHJ74227.1  putative toll-like receptor 13 [ <i>Danaus plexippus</i> ]                        | 5E-38                                                                                                                    |         |         |
|                     | joint2_c6344  | 799              | >gi 357622857 gb EHJ74227.1  putative toll-like receptor 13 [ <i>Danaus plexippus</i> ]                        | 2E-96                                                                                                                    |         |         |
|                     | c20425        | 698              | >gi 389609959 dbj BAM18591.1  Toll-like receptor [ <i>Papilio xuthus</i> ]                                     | 4E-50                                                                                                                    | Partial |         |
|                     | joint2_c6812  | 1731             | >gi 182511220 ref NP_001116821.1  18 wheeler precursor [ <i>Bombyx mori</i> ]                                  | 0.0                                                                                                                      |         |         |
|                     | c16695        | 982              | >gi 318104931 gb ADV41489.1  toll receptor 18 wheeler [ <i>Spodoptera frugiperda</i> ]                         | 0.0                                                                                                                      |         |         |
|                     | c16515        | 659              | >gi 357617686 gb EHJ70927.1  18 wheeler [ <i>Danaus plexippus</i> ]                                            | 3E-84                                                                                                                    |         |         |
|                     | c37507        | 390              | >gi 357627953 gb EHJ77461.1  18 wheeler [ <i>Danaus plexippus</i> ]                                            | 4E-40                                                                                                                    |         |         |
|                     | c28269        | 407              | >gi 318104931 gb ADV41489.1  toll receptor 18 wheeler [ <i>Spodoptera frugiperda</i> ]                         | 3E-45                                                                                                                    |         |         |
|                     | c26372        | 456              | >gi 318104931 gb ADV41489.1  toll receptor 18 wheeler [ <i>Spodoptera frugiperda</i> ]                         | 2E-32                                                                                                                    |         |         |
|                     | c23998        | 356              | >gi 363497934 gb AEW24430.1  toll [ <i>Spodoptera exigua</i> ]                                                 | 2E-48                                                                                                                    |         |         |
|                     | joint2_c3284  | 2124             | >gi 345479829 ref XP_001604871.2  PREDICTED: protein toll [ <i>Nasonia vitripennis</i> ]                       | 2E-76                                                                                                                    |         |         |
|                     | c46305        | 637              | >gi 91076464 ref XP_971999.1  PREDICTED: similar to toll [ <i>Tribolium castaneum</i> ]                        | 2E-81                                                                                                                    |         |         |
|                     | c21766        | 731              | >gi 357617307 gb EHJ70712.1  putative toll [ <i>Danaus plexippus</i> ]                                         | 1E-64                                                                                                                    |         |         |
|                     | c44912        | 551              | >gi 91076464 ref XP_971999.1  PREDICTED: similar to toll [ <i>Tribolium castaneum</i> ]                        | 4E-72                                                                                                                    |         |         |
|                     | MyD88         | joint2_c5546     | 2525                                                                                                           | >gi 357622568 gb EHJ73995.1  putative Myeloid differentiation primary response protein MyD88 [ <i>Danaus plexippus</i> ] | 2E-55   | Full    |
|                     |               | joint2_c8044     | 1454                                                                                                           | >gi 388252723 gb AFK24444.1  MyD88 [ <i>Spodoptera frugiperda</i> ]                                                      | 1E-164  | Partial |
|                     | Tollip        | c14199           | 1951                                                                                                           | >gi 512891539 ref XP_004922709.1  PREDICTED: toll-interacting protein-like [ <i>Bombyx mori</i> ]                        | 2E-10   | Partial |
|                     |               | c19207           | 624                                                                                                            | >gi 91081565 ref XP_975168.1  PREDICTED: similar to Toll-interacting protein [ <i>Tribolium castaneum</i> ]              | 6E-26   |         |
|                     | Tube          | joint2_c8555     | 2183                                                                                                           | >gi 357617711 gb EHJ70951.1  hypothetical protein KGM_14811 [ <i>Danaus plexippus</i> ]                                  | 1E-104  | Full    |
|                     | Pellino       | joint2_rep_c3710 | 3514                                                                                                           | >gi 512886824 ref XP_004921823.1  PREDICTED: protein pellino-like [ <i>Bombyx mori</i> ]                                 | 3E-133  | Partial |
| Pelle               | c36088        | 429              | >gi 385048188 gb AFI39855.1  pelle, partial [ <i>Daphnia parvula</i> ]                                         | 2E-31                                                                                                                    | Full    |         |
|                     | c42147        | 785              | >gi 512906233 ref XP_004926145.1  PREDICTED: serine/threonine-protein kinase pelle-like [ <i>Bombyx mori</i> ] | 4E-42                                                                                                                    |         |         |
| Traf                | joint2_c8521  | 444              |                                                                                                                | 5E-23                                                                                                                    |         |         |
|                     | L13084_T1     | 146              |                                                                                                                | 2E-16                                                                                                                    | Partial |         |
|                     | L12209_T1     | 163              | >gi 379698888 ref NP_001243915.1  TRAF6 [ <i>Bombyx mori</i> ]                                                 | 3E-16                                                                                                                    |         |         |
|                     | L13118_T1     | 145              |                                                                                                                | 3E-19                                                                                                                    |         |         |
| Ecsit               | joint2_c9334  | 1445             | >gi 170035114 ref XP_001845416.1  ecsit [ <i>Culex quinquefasciatus</i> ]                                      | 1E-100                                                                                                                   | Full    |         |
| Cactus              | joint2_c6735  | 2183             | >gi 289629214 ref NP_001166191.1  cactus [ <i>Bombyx mori</i> ]                                                | 2E-83                                                                                                                    | Full    |         |
| Dorsal              | joint2_c10766 | 2417             | >gi 357614722 gb EHJ69235.1  embryonic polarity protein dorsal [ <i>Danaus plexippus</i> ]                     | 1E-103                                                                                                                   | Partial |         |
| DIF                 | Not found     |                  |                                                                                                                |                                                                                                                          |         |         |
| <b>Imd pathway</b>  |               |                  |                                                                                                                |                                                                                                                          |         |         |
| IMD                 | c38668        | 592              | >gi 388597545 gb AFK75934.1  IMD-like protein [ <i>Spodoptera exigua</i> ]                                     | 2E-54                                                                                                                    | Partial |         |

|                                           |                   |      |                                  |                                                                                            |        |                                       |
|-------------------------------------------|-------------------|------|----------------------------------|--------------------------------------------------------------------------------------------|--------|---------------------------------------|
| IMD                                       | joint2_c6888      | 536  | >gi 388597545 gb AFK75934.1      | IMD-like protein [ <i>Spodoptera exigua</i> ]                                              | 2E-16  | Partial                               |
| FADD                                      | c7443             | 1377 | >gi 321400088 ref NP_001189465.1 | fadd [ <i>Bombyx mori</i> ]                                                                | 7E-51  | Full                                  |
| Dredd                                     | Not found         |      |                                  |                                                                                            |        |                                       |
| Caspar                                    | joint2_c495       | 785  | >gi 357616510 gb EHJ70237.1      | Fas associated factor 1 [ <i>Danaus plexippus</i> ]                                        |        | 9E-125                                |
|                                           | joint2_c6556      | 837  |                                  |                                                                                            |        | 2E-131                                |
| TAK1                                      | joint2_c2598      | 1201 | >gi 357624974 gb EHJ75547.1      | putative Mitogen-activated protein kinase kinase kinase 7 [ <i>Danaus plexippus</i> ]      | 5E-162 | Partial                               |
| TAB2                                      | joint2_rep_c4196  | 1252 | >gi 357623679 gb EHJ74734.1      | TAK1-associated binding protein 2 isoform A [ <i>Danaus plexippus</i> ]                    | 9E-66  | Partial                               |
| IAP2                                      | c41058            | 409  | >gi 321400074 ref NP_001189458.1 | inhibitor of apoptosis 2 [ <i>Bombyx mori</i> ]                                            |        | 8E-21                                 |
|                                           | c39309            | 300  |                                  |                                                                                            |        | 4E-12                                 |
| IKK $\beta$ (Ird5)                        | joint2_c6441      | 998  | >gi 357624008 gb EHJ74934.1      | Inhibitor of nuclear factor kappa B kinase beta subunit [ <i>Danaus plexippus</i> ]        |        | 1E-114                                |
|                                           | joint2_c9835      | 1349 |                                  |                                                                                            |        | 6E-41                                 |
| IKK $\gamma$ (Kenny)                      | Not found         |      |                                  |                                                                                            |        |                                       |
| UBcC (Effete)                             | joint2_rep_c1636  | 1810 | >gi 357604946 gb EHJ64394.1      | effete [ <i>Danaus plexippus</i> ]                                                         | 5E-99  | Full                                  |
| Uev1a                                     | joint2_c554       | 1742 | >gi 512928183 ref XP_004931520.1 | PREDICTED: ubiquitin-conjugating enzyme E2 variant 2-like [ <i>Bombyx mori</i> ]           | 1E-92  | Full                                  |
| Ubc13 (Bend)                              | joint2_rep_c3381  | 1608 | >gi 114051115 ref NP_001040393.1 | ubiquitin conjugating enzyme E2 [ <i>Bombyx mori</i> ]                                     | 3E-86  | Full                                  |
|                                           | c6453             | 2060 | >gi 346987771 gb AEO51739.1      | relish [ <i>Helicoverpa armigera</i> ]                                                     | 2E-180 | Partial                               |
| Relish                                    | joint2_c9990      | 707  | >gi 363497936 gb AEW24431.1      | relish [ <i>Spodoptera exigua</i> ]                                                        | 3E-108 | Partial                               |
|                                           | c13122            | 717  | >gi 363497936 gb AEW24431.1      | relish [ <i>Spodoptera exigua</i> ]                                                        | 8E-105 | Partial                               |
| <b>Negative regulators of IMD pathway</b> |                   |      |                                  |                                                                                            |        |                                       |
| Pirk                                      | Not found         |      |                                  |                                                                                            |        |                                       |
| POSH                                      | L4001_T1          | 1041 | >gi 345487941 ref XP_001606578.2 | PREDICTED: SH3 domain-containing RING finger protein 3-like [ <i>Nasonia vitripennis</i> ] | 7E-82  | Partial                               |
| DNR1                                      | joint2_c5988      | 1549 | >gi 357619816 gb EHJ72245.1      | putative myosin regulatory light chain interacting protein [ <i>Danaus plexippus</i> ]     | 7E-79  | Full                                  |
| CYLD                                      | c31819            | 418  | >gi 512926367 ref XP_004931068.1 | PREDICTED: ubiquitin carboxyl-terminal hydrolase CYLD-like [ <i>Bombyx mori</i> ]          | 3E-46  | Partial                               |
| skpA                                      | rep_c323          | 1050 | >gi 114052370 ref NP_001040518.1 | S-phase kinase-associated protein [ <i>Bombyx mori</i> ]                                   | 2E-96  | Full                                  |
| Cullin                                    | rep_c7665         | 1161 | >gi 91081955 ref XP_967420.1     | PREDICTED: similar to cullin [ <i>Tribolium castaneum</i> ]                                | 5E-119 | Partial                               |
| Slimb                                     | L1465_T1          | 951  | >gi 157092624 gb ABV22506.1      | Slimb [ <i>Danaus plexippus</i> ]                                                          | 0.0    | Partial                               |
| sickie                                    | joint2_rep_c10241 | 2079 | >gi 512916921 ref XP_004928759.1 | PREDICTED: protein sickie-like [ <i>Bombyx mori</i> ]                                      | 0.0    | Partial                               |
| Scrawny (dUSP36)                          | L9905_T1          | 263  | >gi 512928201 ref XP_004931523.1 | PREDICTED: ubiquitin carboxyl-terminal hydrolase 36-like [ <i>Bombyx mori</i> ]            | 4E-50  | Partial                               |
| Akirin                                    | joint2_rep_c1441  | 923  | >gi 379699008 ref NP_001243977.1 | akirin protein [ <i>Bombyx mori</i> ]                                                      |        | 8E-63                                 |
|                                           | rep_c255          | 1787 |                                  |                                                                                            |        | Partial                               |
| <b>JAK/STAT pathway</b>                   |                   |      |                                  |                                                                                            |        |                                       |
| Domless                                   | joint2_c9929      | 686  | >gi 261335947 emb CBH09280.1     | putative tyrosine phosphatase [ <i>Heliconius melpomene</i> ]                              |        | 8E-84                                 |
|                                           | joint2_c8943      | 355  |                                  |                                                                                            |        | 1E-31                                 |
| JAK (hopscotch)                           | c28082            | 598  | >gi 357607423 gb EHJ65487.1      | putative tyrosine-protein kinase jak2 [ <i>Danaus plexippus</i> ]                          |        | 1E-92                                 |
|                                           | c27398            | 511  |                                  |                                                                                            |        | 2E-42                                 |
| STAT (unpaired)                           | c10638            | 896  |                                  |                                                                                            |        | 1E-151                                |
|                                           | joint2_c4458      | 1227 |                                  |                                                                                            |        | 0.0                                   |
|                                           | c35515            | 393  |                                  |                                                                                            |        | >gi 17225564 gb AAL37476.1 AF329946_1 |
|                                           | L3562_T1          | 402  |                                  |                                                                                            |        | 2E-33                                 |
|                                           | L3562_T2          | 349  |                                  |                                                                                            |        | 2E-33                                 |
| PIAS                                      | c23834            | 806  | >gi 385259116 gb AFI55458.1      | PIAS2 protein [ <i>Bombyx mori</i> ]                                                       | 1E-111 | Partial                               |
| SOCS                                      | joint2_c4404      | 2267 | >gi 357620333 gb EHJ72563.1      | suppressor of cytokine signaling 6 [ <i>Danaus plexippus</i> ]                             | 1E-136 | Full                                  |
| <b>JNK pathway</b>                        |                   |      |                                  |                                                                                            |        |                                       |
| Hem                                       | c28696            | 682  | >gi 357616343 gb EHJ70140.1      | putative membrane-associated protein gex-3 [ <i>Danaus plexippus</i> ]                     | 1E-102 | Partial                               |

|             |                  |      |                                                                                                     |                                                                                               |
|-------------|------------------|------|-----------------------------------------------------------------------------------------------------|-----------------------------------------------------------------------------------------------|
| Hem         | rep_c2497        | 1579 | >gi 357616343 gb EHJ70140.1  putative membrane-associated protein gex-3 [ <i>Danaus plexippus</i> ] | 1E-88                                                                                         |
|             | c34937           | 304  |                                                                                                     | 7E-45 Partial                                                                                 |
|             | c28148           | 426  |                                                                                                     | >gi 332017367 gb EGI58109.1  Membrane-associated protein Hem [ <i>Acromyrmex echinator</i> ]  |
| Basket      | Not found        |      |                                                                                                     |                                                                                               |
| Fos (kayak) | c12189           | 531  | >gi 357622228 gb EHJ73792.1  kayak isoform A [ <i>Danaus plexippus</i> ]                            | 4E-52                                                                                         |
|             | c19720           | 449  |                                                                                                     | 7E-17 Partial                                                                                 |
|             | c16092           | 479  |                                                                                                     | 4E-15                                                                                         |
|             | c12451           | 1453 |                                                                                                     | >gi 380012628 ref XP_003690381.1  PREDICTED: proto-oncogene c-Fos-like [ <i>Apis florea</i> ] |
| Jun         | joint2_rep_c2246 | 2541 | >gi 388540204 gb AFK64813.1  c-jun-like protein [ <i>Helicoverpa armigera</i> ]                     | 1E-132 Full                                                                                   |
|             | L23568_T1        | 114  | >gi 357613266 gb EHJ68412.1  c-Jun NH2-terminal kinase [ <i>Danaus plexippus</i> ]                  | 3E-13 Partial                                                                                 |

| Gene name                     | Sf_TR2012b ID    | Size (nt)        | Best Blastx                                                                                    | E-value                                                                          | Status  |       |         |
|-------------------------------|------------------|------------------|------------------------------------------------------------------------------------------------|----------------------------------------------------------------------------------|---------|-------|---------|
| <b>Phenoloxidase System</b>   |                  |                  |                                                                                                |                                                                                  |         |       |         |
| PPAEs                         | joint2_c2301     | 1481             | >gi 56718388 gb AAW24480.1  prophenol oxidase activating enzyme 1 [ <i>Spodoptera litura</i> ] | 0.0                                                                              | Full    |       |         |
|                               | rep_c3743        | 1665             |                                                                                                | 0.0                                                                              |         |       |         |
|                               | L5381_T1         | 572              | >gi 112983934 ref NP_001036844.1  BzArgOEtase precursor [ <i>Bombyx mori</i> ]                 | 1E-69                                                                            | Partial |       |         |
|                               | joint2_rep_c7331 | 666              | >gi 56718390 gb AAW24481.1  prophenol oxidase activating enzyme 3 [ <i>Spodoptera litura</i> ] | 7E-82                                                                            | Full    |       |         |
|                               | joint2_rep_c7313 | 1521             |                                                                                                | 1E-107                                                                           |         |       |         |
| PPO1                          | joint2_rep_c2737 | 1440             | >gi 82880634 gb ABB92834.1  prophenoloxidase subunit 1 [ <i>Spodoptera frugiperda</i> ]        | 0E+00                                                                            | Partial |       |         |
|                               | joint2_c8944     | 2240             |                                                                                                |                                                                                  |         |       |         |
| PPO2                          | joint2_rep_c165  | 2619             | >gi 82880636 gb ABB92835.1  prophenoloxidase subunit 2 [ <i>Spodoptera frugiperda</i> ]        | 0E+00                                                                            | Full    |       |         |
| Phenoloxidase Inhibitor       | rep_c3203        | 599              | >gi 116833169 gb ABK29497.1  phenoloxidase inhibitor protein [ <i>Helicoverpa armigera</i> ]   | 4E-06                                                                            | Full    |       |         |
|                               | rep_c7945        | 509              |                                                                                                | 2E-07                                                                            |         |       |         |
| <b>Antimicrobial peptides</b> |                  |                  |                                                                                                |                                                                                  |         |       |         |
| Attacin                       | joint2_c9574     | 1003             | >gi 1703758 sp P50725.1 ATTA_TRINI RecName: Full=Attacin-A; Flags: Precursor                   | 1E-83                                                                            | Full    |       |         |
|                               | joint2_c6638     | 924              |                                                                                                | 7E-83                                                                            |         |       |         |
|                               | rep_c30214       | 1028             |                                                                                                | 2E-85                                                                            |         |       |         |
|                               | rep_c16033       | 1116             |                                                                                                | 9E-87                                                                            |         |       |         |
|                               | rep_c9395        | 995              |                                                                                                | 2E-87                                                                            |         |       |         |
|                               | rep_c2883        | 925              |                                                                                                | 6E-82                                                                            |         |       |         |
|                               | joint2_c4106     | 1139             |                                                                                                | >gi 238915975 gb ACR78454.1  attacin [ <i>Heliothis virescens</i> ]              |         | 1E-64 | Full    |
|                               | joint2_rep_c2387 | 1517             |                                                                                                | 2E-75                                                                            |         |       |         |
|                               | rep_c33582       | 445              |                                                                                                | >gi 159193 gb AAA29183.1  attacin E precursor [ <i>Hyalophora cecropia</i> ]     |         | 5E-27 | Partial |
|                               | rep_c6862        | 742              |                                                                                                | >gi 61661433 gb AAX51304.1  cecropin [ <i>Helicoverpa armigera</i> ]             |         | 2E-16 | Full    |
|                               | joint2_rep_c2859 | 555              |                                                                                                | 9E-17                                                                            |         |       |         |
|                               | rep_c20433       | 561              |                                                                                                | >gi 46396047 sp Q9XZG9.1 CECA_SPOLT RecName: Full=Cecropin-A                     |         | 2E-17 | Full    |
|                               | joint2_rep_c4163 | 457              |                                                                                                | >gi 313247970 gb ADR51148.1  cecropin 3 [ <i>Helicoverpa armigera</i> ]          |         | 3E-08 | Full    |
|                               | rep_c485         | 997              |                                                                                                |                                                                                  |         | 6E-11 |         |
|                               | rep_c1453        | 915              |                                                                                                | >gi 112983176 ref NP_001037031.1  cecropin CBM2 precursor [ <i>Bombyx mori</i> ] |         | 4E-11 | Full    |
| rep_c16188                    | 933              |                  | 1E-11                                                                                          |                                                                                  |         |       |         |
| Cecropin                      | rep_c1132        | 803              | >gi 112984238 ref NP_001037460.1  cecropin-B precursor [ <i>Bombyx mori</i> ]                  | 8E-11                                                                            | Full    |       |         |
|                               | rep_c12210       | 1205             | >gi 157704367 gb ABV68872.1  cecropin B [ <i>Trichoplusia ni</i> ]                             | 5E-06                                                                            | Full    |       |         |
|                               | joint2_rep_c1821 | 547              | >gi 61660433 gb AAX51193.1  HacD [ <i>Helicoverpa armigera</i> ]                               | 5E-25                                                                            | Full    |       |         |
|                               | joint2_rep_c2857 | 500              | 3E-22                                                                                          |                                                                                  |         |       |         |
|                               | joint2_rep_c1566 | 959              |                                                                                                | 3E-16                                                                            |         |       |         |
|                               | joint2_rep_c3462 | 539              |                                                                                                | 1E-17                                                                            |         |       |         |
|                               | joint2_rep_c4099 | 519              | >gi 1705742 sp P50721.1 CE3E_HYPCU RecName: Full=Hyphancin-3E                                  | 4E-16                                                                            | Full    |       |         |
|                               | rep_c49718       | 749              |                                                                                                | 3E-17                                                                            |         |       |         |
|                               | rep_c22144       | 383              |                                                                                                | 3E-18                                                                            |         |       |         |
|                               | Defensin         | joint2_rep_c1200 | 643                                                                                            | >gi 157704371 gb ABV68874.1  cobatoxin-like protein [ <i>Trichoplusia ni</i> ]   | 1E-11   | Full  |         |

|            |                  |      |                                                                                     |               |
|------------|------------------|------|-------------------------------------------------------------------------------------|---------------|
|            | rep_c31235       | 505  | >gi 33439724 gb AAQ18900.1  cobatoxin long form B [ <i>Spodoptera frugiperda</i> ]  | 1E-22 Full    |
| Defensin   | rep_c18211       | 391  | >gi 33439716 gb AAQ18896.1  gallerimycin [ <i>Spodoptera frugiperda</i> ]           | 3E-37 Full    |
|            | joint2_rep_c352  | 915  |                                                                                     | 1E-33 chimere |
|            | joint2_rep_c1506 | 611  | >gi 32394732 gb AAM96925.1  defensin precursor [ <i>Spodoptera frugiperda</i> ]     | 2E-47 Full    |
|            | rep_c50766       | 546  |                                                                                     | 9E-53         |
| Gloverin   | rep_c11387       | 765  |                                                                                     | 9E-59 Full    |
|            | rep_c15702       | 683  |                                                                                     | 1E-12 Partial |
|            | rep_c24985       | 441  | >gi 302347126 gb ADL27731.1  gloverin [ <i>Spodoptera exigua</i> ]                  | 1E-11         |
|            | rep_c396         | 872  |                                                                                     | 1E-58 Full    |
|            | rep_c448         | 850  |                                                                                     | 2E-92 Full    |
| Lebocin    | joint2_rep_c2864 | 848  |                                                                                     | 9E-39         |
|            | joint2_rep_c3089 | 679  | >gi 237506881 gb ACQ99193.1  proline-rich protein [ <i>Galleria mellonella</i> ]    | 3E-32         |
|            | rep_c31645       | 829  |                                                                                     | 5E-40         |
|            | joint2_rep_c6464 | 886  |                                                                                     | 3E-39 Full    |
|            | joint2_rep_c4195 | 737  | >gi 57157818 dbj BAD84189.1  lebocin-like protein [ <i>Samia ricini</i> ]           | 6E-26         |
|            | joint2_rep_c874  | 1180 |                                                                                     | 3E-34         |
|            | rep_c1072        | 1133 | >gi 219958088 gb ACL68098.1  pro-lebocin [ <i>Manduca sexta</i> ]                   | 2E-25         |
| rep_c24419 | 601              |      | 6E-16                                                                               |               |
| Lys1       | rep_c48748       | 934  | >gi 206598481 gb ACI16106.1  lysozyme [ <i>Spodoptera litura</i> ]                  | 9E-97 Full    |
| Lys2       | joint2_rep_c2972 | 960  | >gi 44887636 gb AAS48094.1  lysozyme [ <i>Pseudoplusia includens</i> ]              | 6E-60 Full    |
| Lys3       | rep_c18992       | 845  | >gi 29893332 gb AAP03061.1  lysozyme [ <i>Spodoptera exigua</i> ]                   | 6E-34 Full    |
| LLP1       | rep_c2131        | 804  | >gi 145286562 gb ABP52098.1  lysozyme-like protein 1 [ <i>Antheraea mylitta</i> ]   | 6E-58 Full    |
| LLP2       | rep_c4916        | 794  | >gi 357624808 gb EHJ75441.1  lysozyme-like protein 1 [ <i>Danaus plexippus</i> ]    | 2E-46 Full    |
| Moricin    | c34807           | 535  | >gi 343915878 gb AEM66431.1  moricin B3 [ <i>Bombyx mandarina</i> ]                 | 2E-11 Full    |
|            | joint2_rep_c3441 | 403  |                                                                                     | 1E-11         |
|            | rep_c45075       | 365  | >gi 146738004 gb ABQ42580.1  moricin-like peptide D [ <i>Galleria mellonella</i> ]  | 7E-13 Full    |
|            | rep_c9540        | 383  |                                                                                     | 6E-15         |
| Spod-x-tox | joint2_rep_c4528 | 740  |                                                                                     | 1E-114        |
|            | c26837           | 606  |                                                                                     | 6E-69         |
|            | joint2_rep_c4921 | 492  | >gi 379045801 gb AFC87713.1  Spod-11-tox b protein [ <i>Spodoptera frugiperda</i> ] | 3E-69 Partial |
|            | rep_c24787       | 1061 |                                                                                     | 1E-99         |
|            | c41348           | 512  |                                                                                     | 2E-67         |
